# Supplementary material for: Epidemiology and Resistance Phenotypes of Carbapenem-Resistant Klebsiella pneumoniae in Corfu General Hospital (2019–2022): A Comprehensive Time Series Analysis of Resistance Gene Dynamics
Source: MDPI journal article supplement (doi:10.3390/microorganisms11102537), 2023-10-11
Supplement: s1 [file s1]

| Supplementary Table S1: Trends in Antibiotic Resistance Patterns for Klebsiella Isolates (2019-2022)                                                                                                                                                                                                                                                              |                 |                       |
|-------------------------------------------------------------------------------------------------------------------------------------------------------------------------------------------------------------------------------------------------------------------------------------------------------------------------------------------------------------------|-----------------|-----------------------|
| Antibiotic Resistance                                                                                                                                                                                                                                                                                                                                             | Trend Direction | p-value               |
| AZTREONAM RESISTANCE                                                                                                                                                                                                                                                                                                                                              | Increasing      | 0.03196               |
| AK RESISTANCE                                                                                                                                                                                                                                                                                                                                                     | Increasing      | 0.07770               |
| GN RESISTANCE                                                                                                                                                                                                                                                                                                                                                     | Increasing      | 0.00728               |
| SXT RESISTANCE                                                                                                                                                                                                                                                                                                                                                    | Increasing      | 0.00158               |
| TIG RESISTANCE                                                                                                                                                                                                                                                                                                                                                    | Increasing      | 0.00131               |
| COL RESISTANCE                                                                                                                                                                                                                                                                                                                                                    | Fluctuating     | 0.02749               |
| CEF/AVIB RESISTANCE                                                                                                                                                                                                                                                                                                                                               | Decreasing      | $1.99 \times 10^{-8}$ |
| Note: The table represents the Cochran-Armitage Trend Test results for antibiotic resistance patterns in Klebsiella isolates over the years 2019 to 2022. The p-value tests the hypothesis that there is no trend, with values below 0.05 indicating statistical significance. Interpretation of the trend direction should be aligned with observed frequencies. |                 |                       |

| Supplementary Table S2: Trends in Resistance Genes Patterns for Klebsiella Isolates (2019-2022)                                                                                                                                                                                                                                                              |                 |                       |
|--------------------------------------------------------------------------------------------------------------------------------------------------------------------------------------------------------------------------------------------------------------------------------------------------------------------------------------------------------------|-----------------|-----------------------|
| Resistance Genes                                                                                                                                                                                                                                                                                                                                             | Trend Direction | p-value               |
| bla-KPC                                                                                                                                                                                                                                                                                                                                                      | Increasing      | $1.80 \times 10^{-7}$ |
| bla-NDM                                                                                                                                                                                                                                                                                                                                                      | Decreasing      | $2.19 \times 10^{-7}$ |
| bla-VIM                                                                                                                                                                                                                                                                                                                                                      | Fluctuating     | 0.1537                |
| bla-OXA-48                                                                                                                                                                                                                                                                                                                                                   | Fluctuating     | 0.4010                |
| mcr-1                                                                                                                                                                                                                                                                                                                                                        | Constant        | 1.0000                |
| Note: The table represents the Cochran-Armitage Trend Test results for resistance genes patterns in Klebsiella isolates over the years 2019 to 2022. The p-value tests the hypothesis that there is no trend, with values below 0.05 indicating statistical significance. Interpretation of the trend direction should be aligned with observed frequencies. |                 |                       |

| Supplementary Table S3: Prevalence of Resistance Genes in Carbapenem-Resistant Klebsiella pneumoniae Strains, Stratified by Six-Month Periods from 2019 to 2022                                                            |             |             |            |            |           |
|----------------------------------------------------------------------------------------------------------------------------------------------------------------------------------------------------------------------------|-------------|-------------|------------|------------|-----------|
| 6-Month Period                                                                                                                                                                                                             | bla-KPC     | bla-NDM     | bla-VIM    | bla-OXA-48 | mcr-1     |
| Jan-Jun 2019                                                                                                                                                                                                               | 5 (20.83%)  | 19 (79.17%) | 1 (4.17%)  | 0 (0.00%)  | 0 (0.00%) |
| Jul-Dec 2019                                                                                                                                                                                                               | 5 (18.52%)  | 19 (70.37%) | 3 (11.11%) | 0 (0.00%)  | 0 (0.00%) |
| Jan-Jun 2020                                                                                                                                                                                                               | 4 (18.18%)  | 18 (81.82%) | 0 (0.00%)  | 0 (0.00%)  | 0 (0.00%) |
| Jul-Dec 2020                                                                                                                                                                                                               | 4 (20.00%)  | 16 (80.00%) | 1 (5.00%)  | 0 (0.00%)  | 0 (0.00%) |
| Jan-Jun 2021                                                                                                                                                                                                               | 4 (14.81%)  | 22 (81.48%) | 0 (0.00%)  | 1 (3.70%)  | 0 (0.00%) |
| Jul-Dec 2021                                                                                                                                                                                                               | 5 (18.52%)  | 22 (81.48%) | 0 (0.00%)  | 0 (0.00%)  | 0 (0.00%) |
| Jan-Jun 2022                                                                                                                                                                                                               | 17 (56.67%) | 12 (40.00%) | 1 (3.33%)  | 0 (0.00%)  | 0 (0.00%) |
| Jul-Dec 2022                                                                                                                                                                                                               | 21 (60.00%) | 13 (37.14%) | 1 (2.86%)  | 0 (0.00%)  | 0 (0.00%) |
| Note: The table delineates the prevalence of resistance genes (bla-KPC, bla-NDM, bla-VIM, bla-OXA-48, mcr-1) in K. Pneumoniae multidrug resistant isolates for each six-month interval from January 2019 to December 2022. |             |             |            |            |           |
